# Supplementary material for: Study and Characterization of H3PO4 Activated Carbons Prepared from Jujube Stones for the Treatment of Industrial Textile Effluents
Source: MDPI journal article supplement (doi:10.3390/pr11092694), 2023-09-08
Supplement: s1 [file s1]

## Supplementary material

# Study and Characterization of H<sub>3</sub>PO<sub>4</sub> Activated Carbons Prepared from Jujube Stones for the Treatment of Industrial Textile Effluents

Nasma Bouchelkia <sup>1,2</sup>, Kheira Benazouz <sup>1,2</sup>, Amal Mameri <sup>2</sup>, Lazhar Belkhiri <sup>3</sup>, Nadia Hamri <sup>2,4</sup>, Hayet Belkacemi <sup>5</sup>, Abdelhalim Zoukel <sup>6,7</sup>, Abdeltif Amrane <sup>8</sup>, Fodil Aoulmi <sup>9</sup> and Lotfi Mouni <sup>2,\*</sup>

<sup>1</sup> Département de Génie des Procédés, Faculté de Technologie, Université de Bejaia, Bejaia 06000, Algeria; nasma.bouchelkia@univ-bejaia.dz (N.B.)

<sup>2</sup> Laboratory of Management and Valorization of Natural Resources and Quality Assurance, SNVST Faculty, Akli Mohand Oulhadj University, Bouira 10000, Algeria; nadia.hamri@univ-bejaia.dz (N.H.)

<sup>3</sup> Laboratory of Applied Research in Hydraulics, University of Mustapha Ben Boulaid of Batna 2, Batna 05000, Algeria; belkhiri.la@gmail.com

<sup>4</sup> Département de Chimie, Faculté des Sciences Exactes, Université de Bejaia, Bejaia 06000, Algeria

<sup>5</sup> Technology Laboratory of Materials and Process Engineering (LTMGP), University of Bejaia, Bejaia 06000, Algeria; hayet.belkacemi@univ-bejaia.dz

<sup>6</sup> Laboratory Physico-Chemistry of Materials, Laghouat University, Laghouat 03000, Algeria; ab.zoukel@lagh-univ.dz

<sup>7</sup> Center for Scientific and Technical Research in Physicochemical Analysis (PTAPC, Laghouat-CRAPC), Laghouat 03000, Algeria

<sup>8</sup> Univ Rennes, Ecole Nationale Supérieure de Chimie de Rennes, CNRS, ISCR-UMR6226, F-35000 Rennes, France; abdeltif.amrane@univ-rennes1.fr

<sup>9</sup> Center for Scientific and Technical Research in Physicochemical Analysis, CRAPC, BP 384, Bou-Ismaïl, Tipaza 42004, Algeria

\* Correspondence: l.mouni@univ-bouira.dz

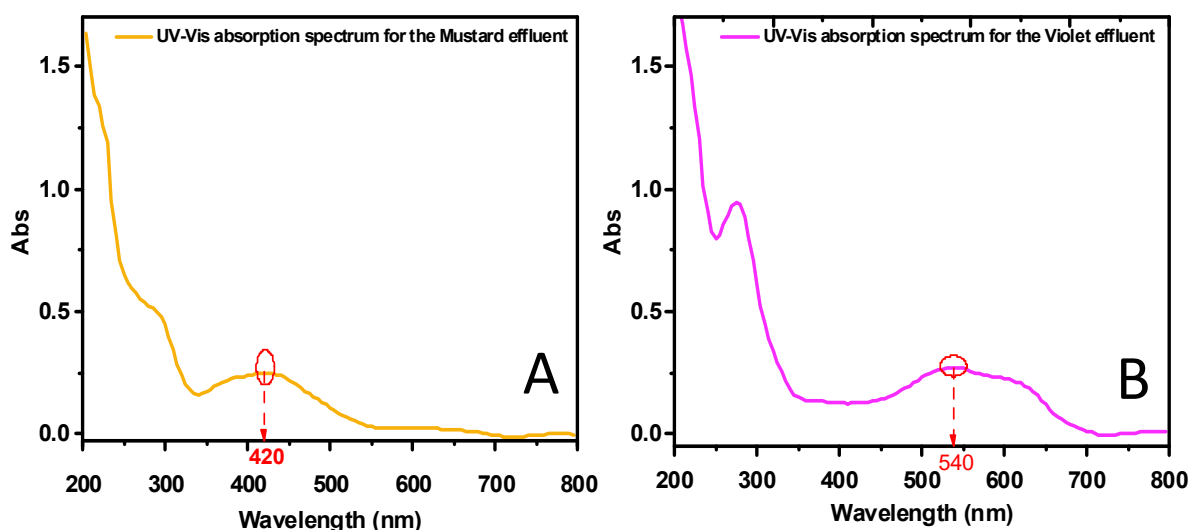

Figure S1. UV-Vis absorption spectra of (A) Mustard effluent and (B) Violet effluent.
